# Supplementary material
Source: PubMed Central journal article supplement (PMC10278086)
Supplement: NIHMS1904160-supplement-1.pdf [file NIHMS1904160-supplement-1.pdf]

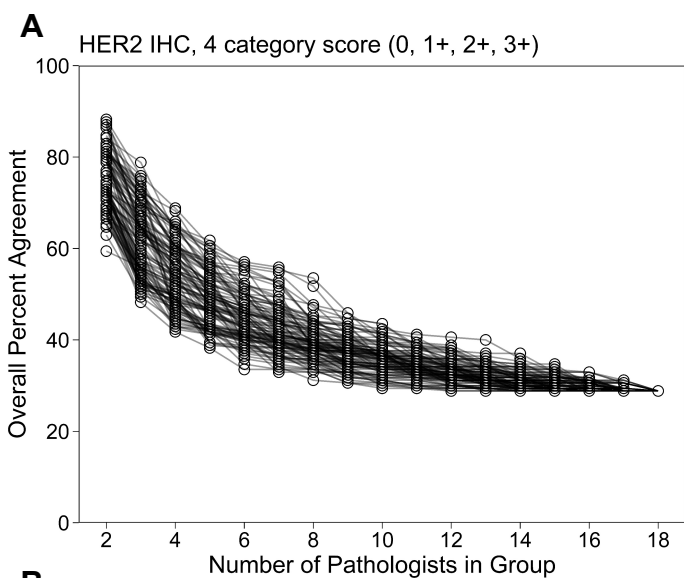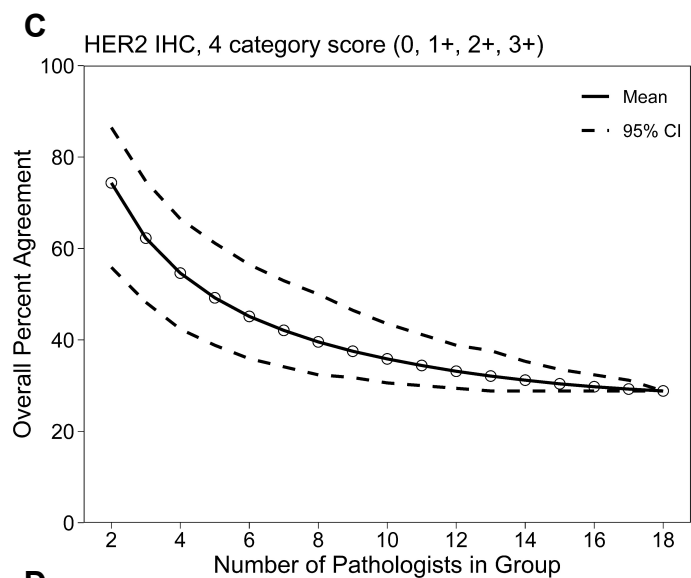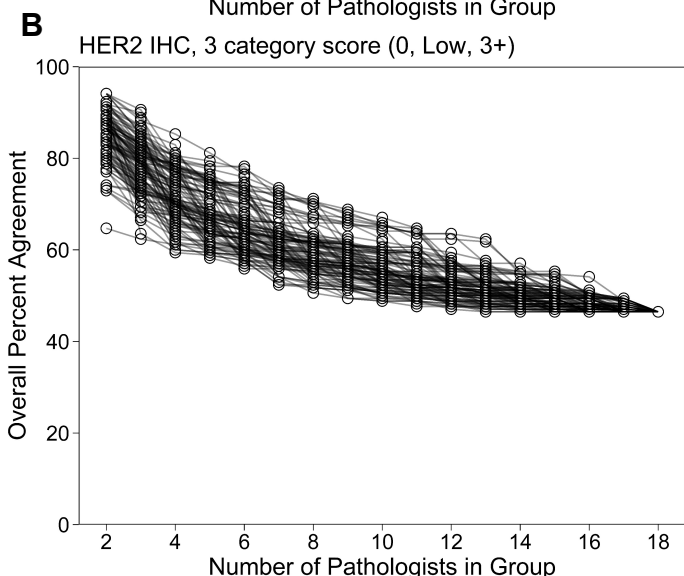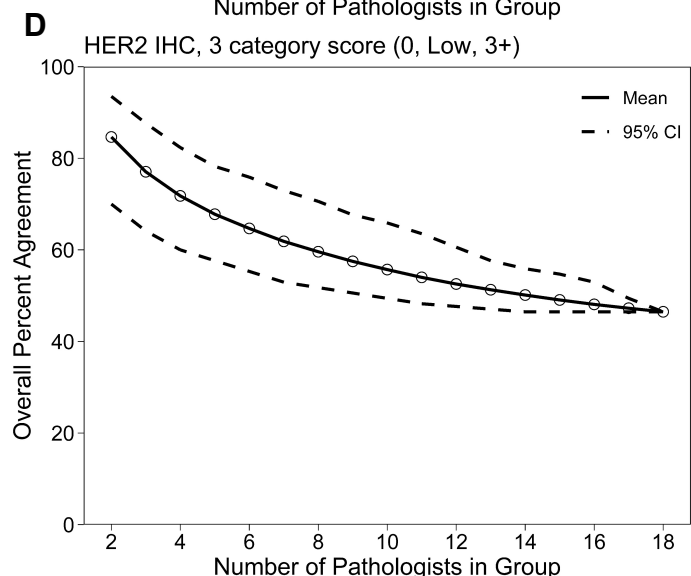

**Figure S1: Comparison of HER2 IHC four- and three-category score ONEST plots.** (A,B) are the OPA results from 100 curves and (C,D) the mean and 95% confidence interval of 1000 curves randomly generated from all possible combinations of pathologists.

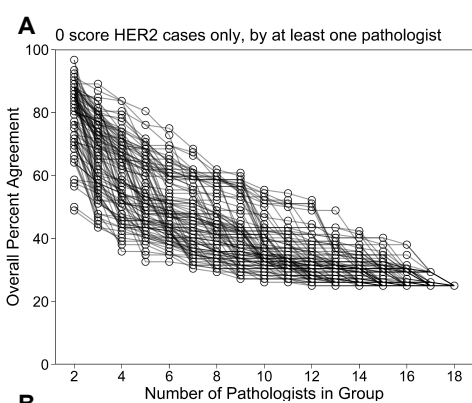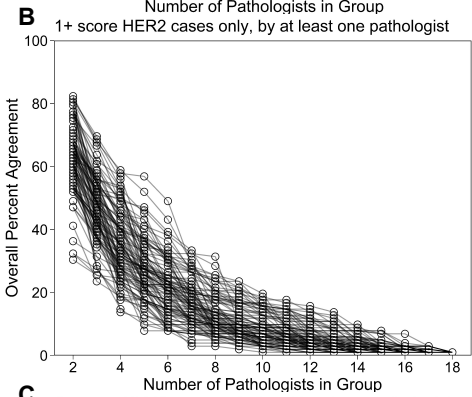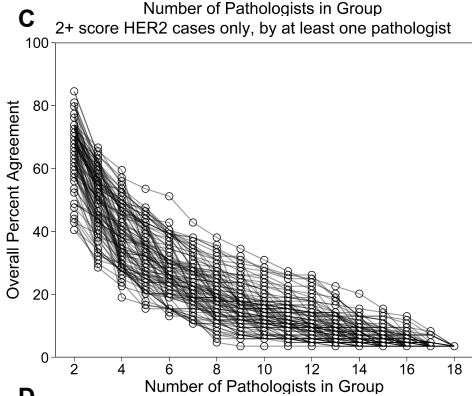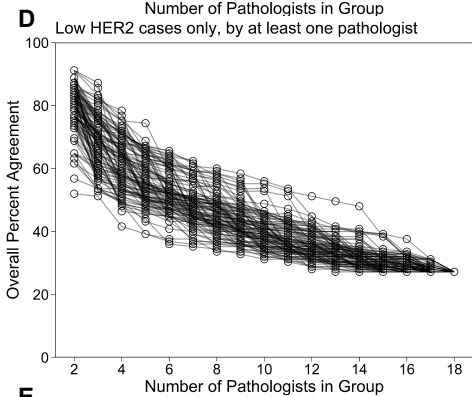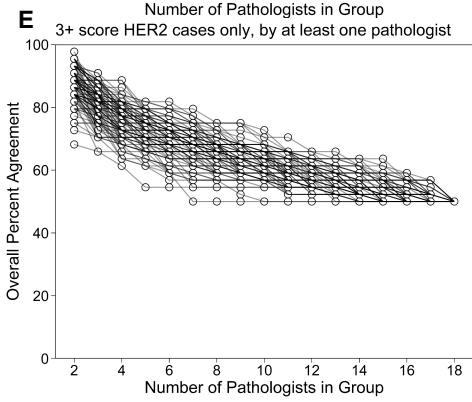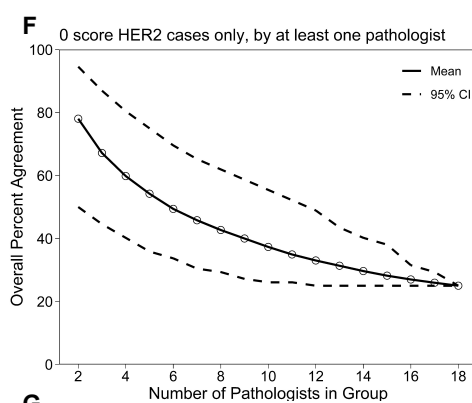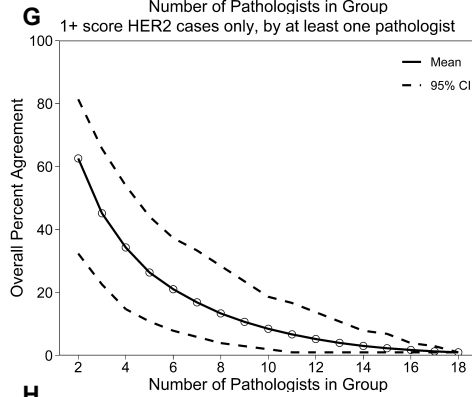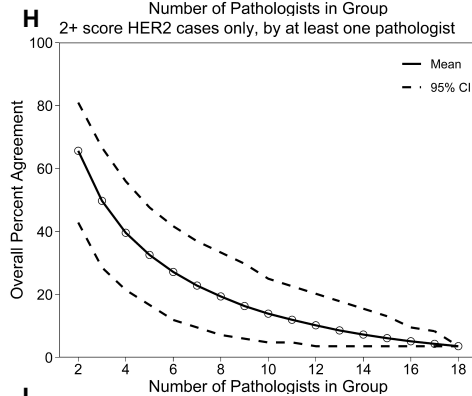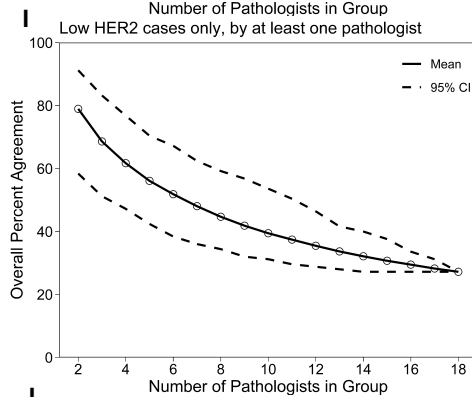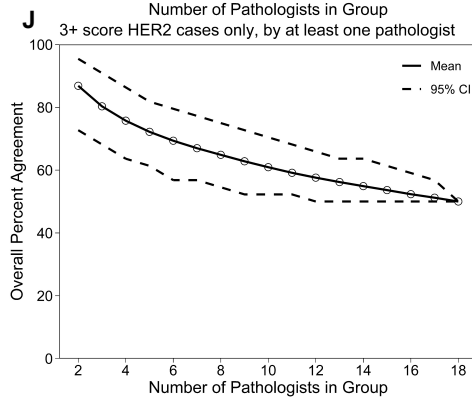

**Figure S2: HER2 IHC ONEST plots for each subset of cases (0, 1+, 2+, Low, or 3+ cases only). Cases with at least one score for the category were included in the analysis. “Low” is the result of combining 1+ and 2+ cases into the same category. (A-E) are the OPA results from 100 curves and (F-J) the mean and 95% confidence interval of 1000 curves randomly generated from all possible combinations of pathologists.**

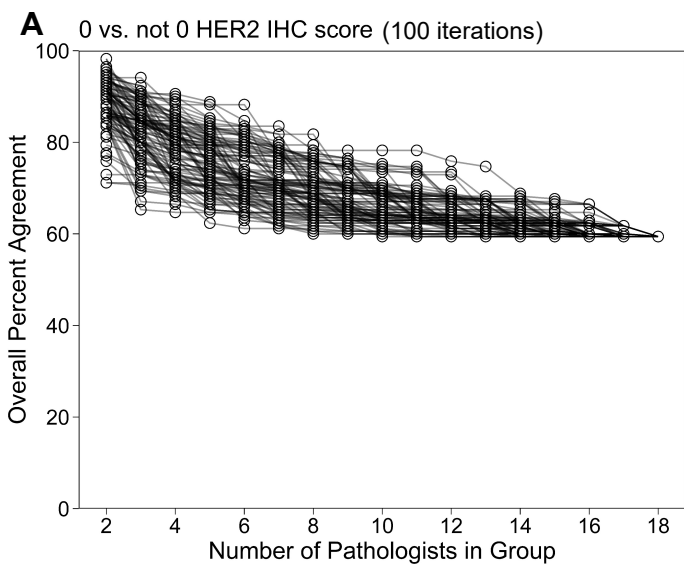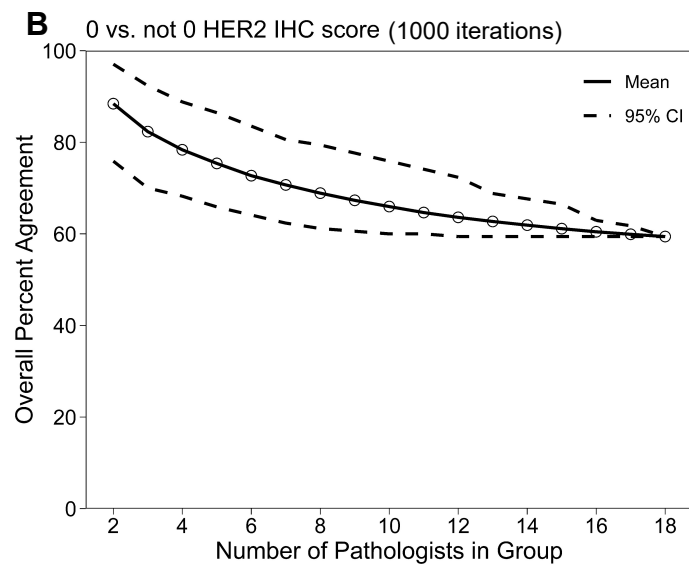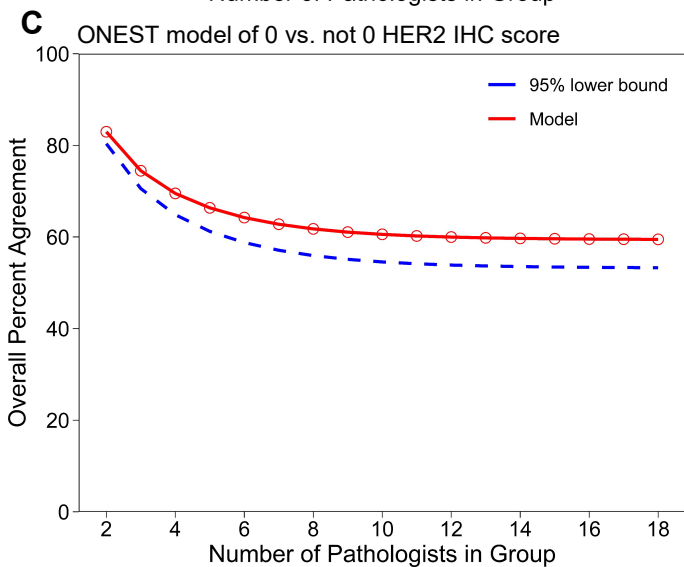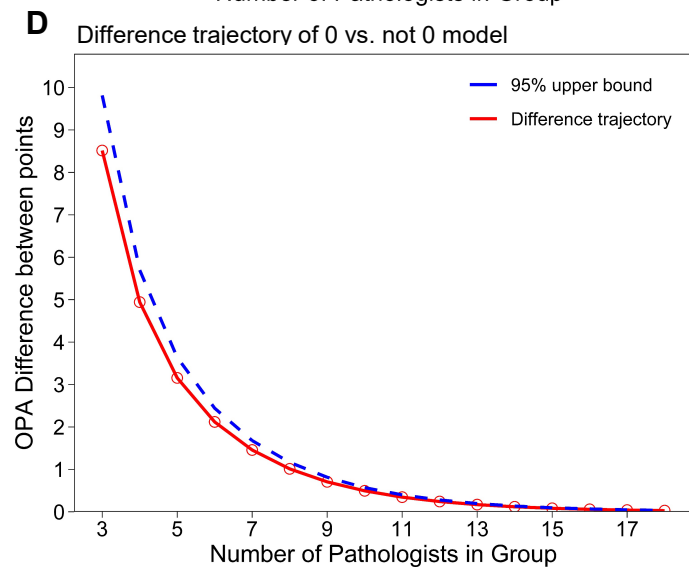

**Figure S3: HER2 IHC 0 vs. not 0 with ONEST model and difference trajectory.**

(A) is the OPA result from 100 curves and (B) the mean and 95% confidence interval of 1000 curves randomly generated from all possible combinations of pathologists. (C) is a plot of the statistical ONEST model used to predict the presence of a nonzero plateau of OPA. (D) is the OPA difference between successive groups of pathologists. The lower bound of OPA plateaus at 54.5% with 10 pathologists inside the group (0.399% difference less than 0.5%).

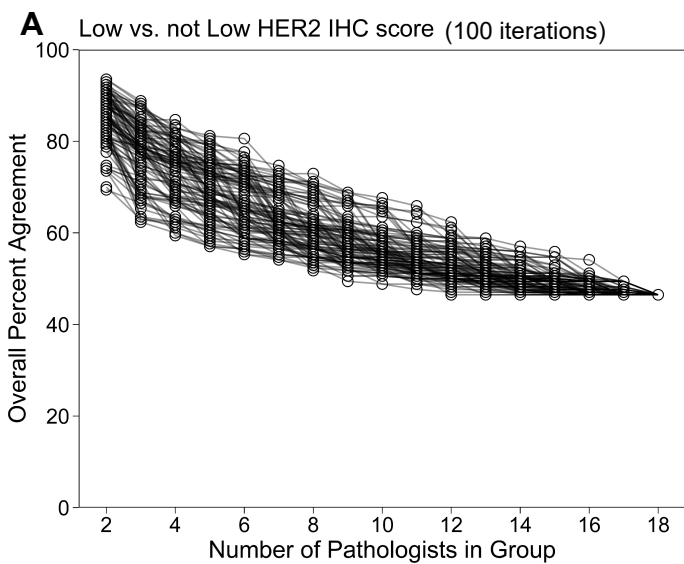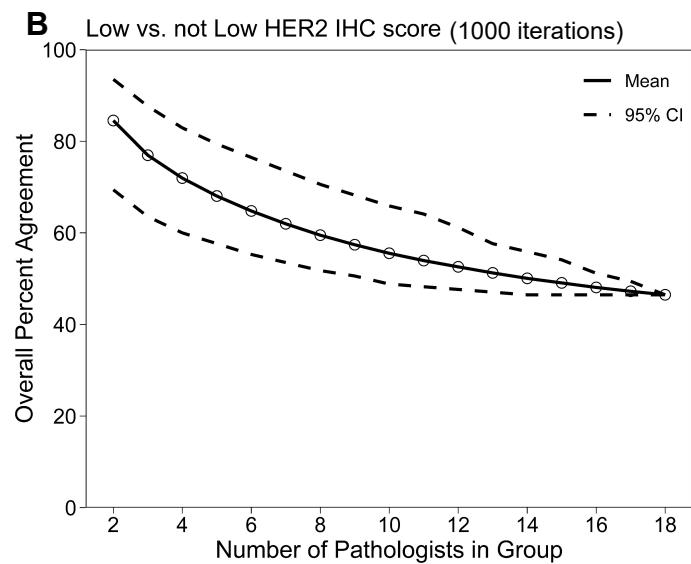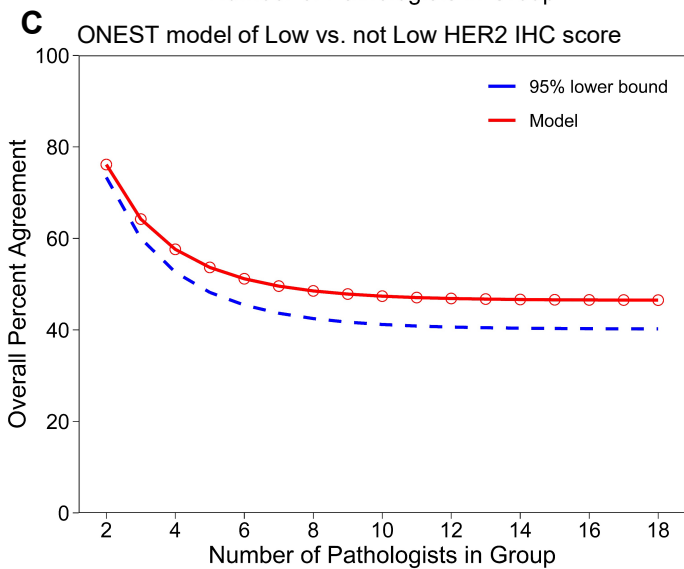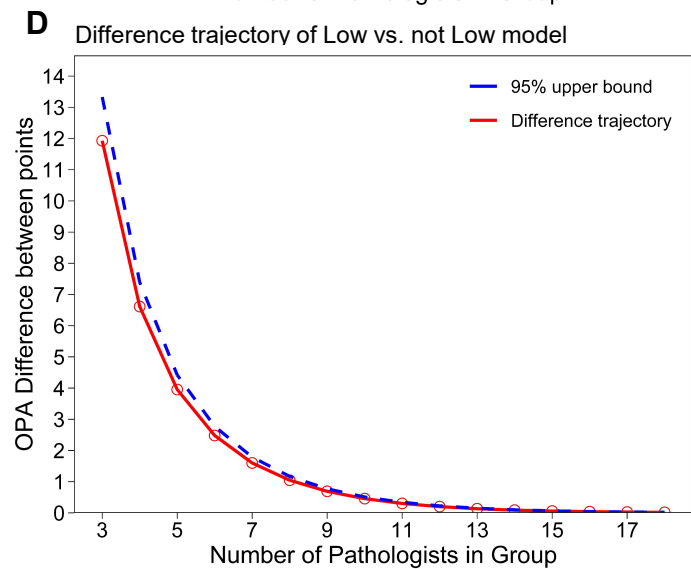

**Figure S4: HER2 IHC Low vs. not Low with ONEST model and difference trajectory.** (A) is the OPA result from 100 curves and (B) the mean and 95% confidence interval of 1000 curves randomly generated from all possible combinations of pathologists. (C) is a plot of the statistical ONEST model used to predict the presence of a nonzero plateau of OPA. (D) is the OPA difference between successive groups of pathologists. The lower bound of OPA plateaus at 41.2% with 10 pathologists inside the group (0.339% difference less than 0.5%).



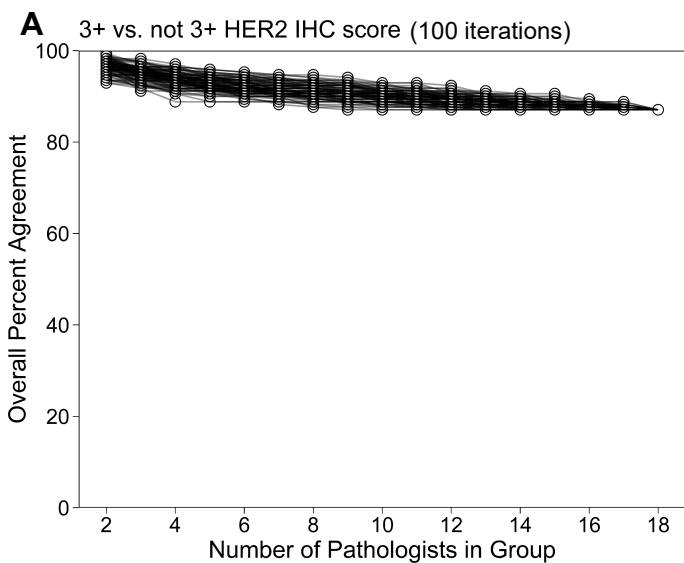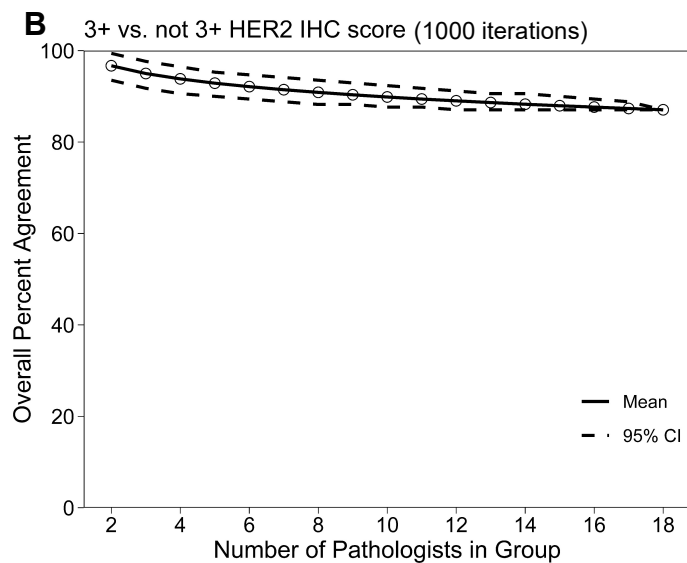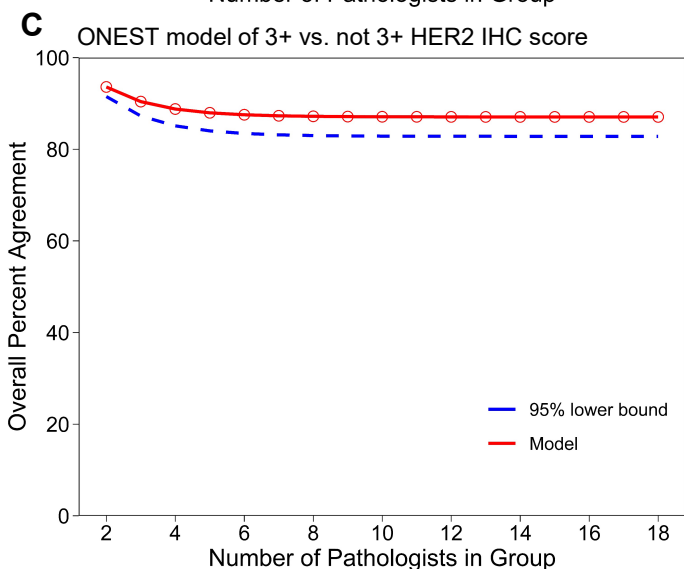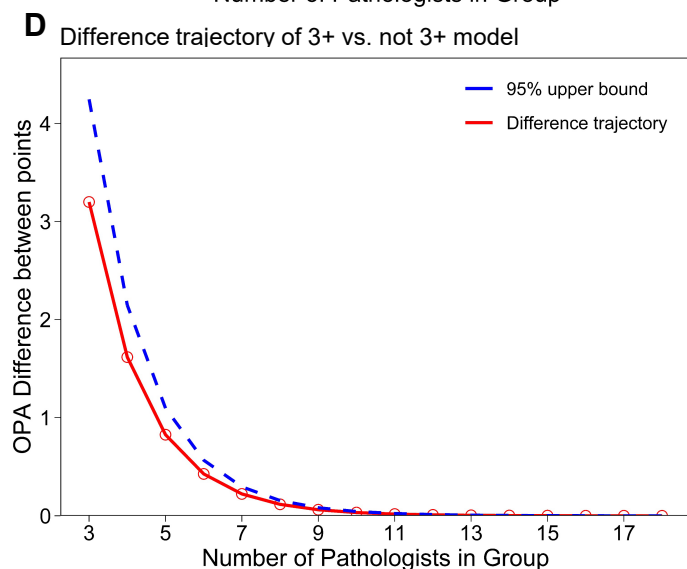

**Figure S5: HER2 IHC 3+ vs not 3+ with ONEST model and difference trajectory.** (A) is the OPA result from 100 curves and (B) the mean and 95% confidence interval of 1000 curves randomly generated from all possible combinations of pathologists. (C) is a plot of the statistical ONEST model used to predict the presence of a nonzero plateau of OPA. (D) is the OPA difference between successive groups of pathologists. The lower bound of OPA plateaus at 83.5% with 6 pathologists inside the group (0.295% difference less than 0.5%).

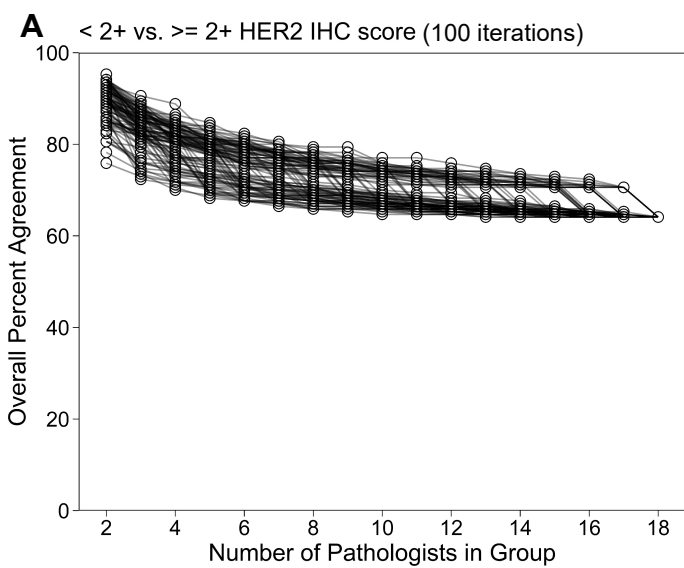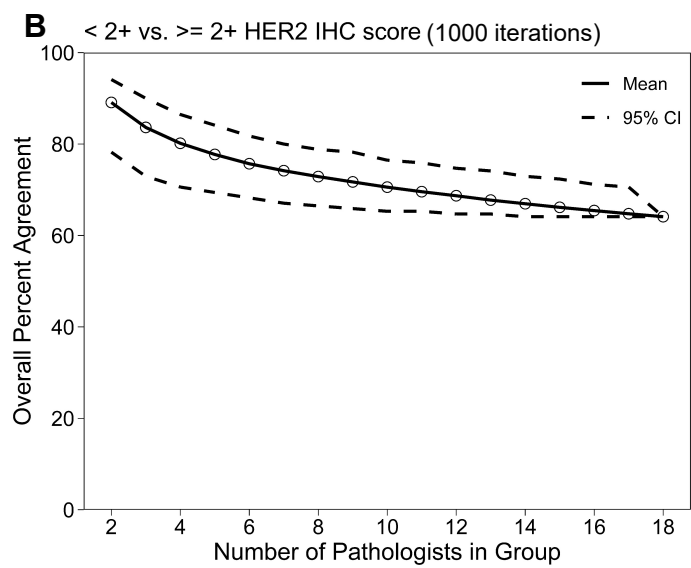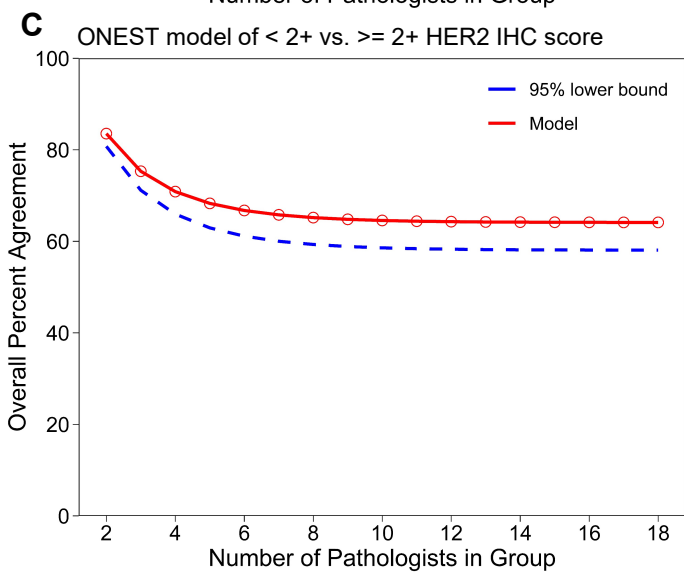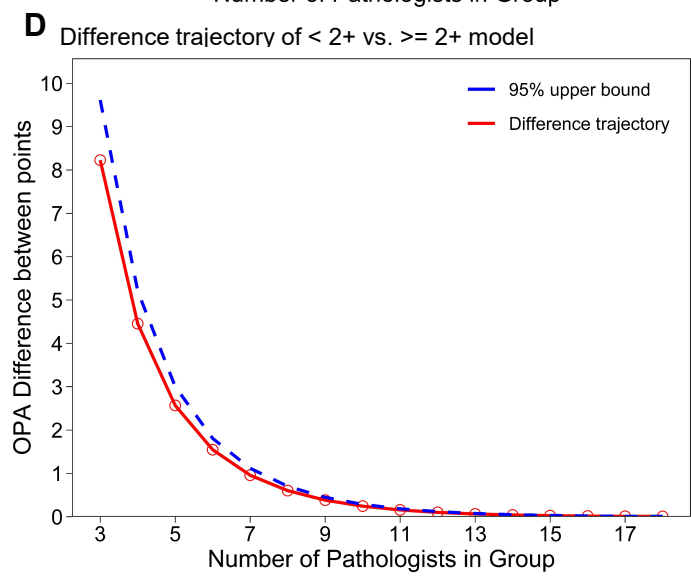

**Figure S6: HER2 IHC < 2+ vs  $\geq$  2+ with ONEST model and difference trajectory.** (A) is the OPA result from 100 curves and (B) the mean and 95% confidence interval of 1000 curves randomly generated from all possible combinations of pathologists. (C) is a plot of the statistical ONEST model used to predict the presence of a nonzero plateau of OPA. (D) is the OPA difference between successive groups of pathologists. The lower bound of OPA plateaus at 59.3% with 8 pathologists inside the group (0.448% difference less than 0.5%).

**Table S1: Amount of HER2 IHC ratings for each subset of cases amongst 18 pathologists and 170 cases of breast cancer.**

| <b>HER2 IHC group</b> | <b>0 counts</b> | <b>1+ counts</b> | <b>2+ counts</b> | <b>3+ counts</b> | <b>Total Ratings</b> |
|-----------------------|-----------------|------------------|------------------|------------------|----------------------|
| 0 only                | 786             | 785              | 85               | 0                | 1656                 |
| 1+ only               | 372             | 1073             | 388              | 3                | 1836                 |
| 2+ only               | 74              | 633              | 628              | 177              | 1512                 |
| 3+ only               | 0               | 18               | 201              | 573              | 792                  |

*Each subset is defined by only including cases with the score from at least one pathologist*

**Table S2: Number of HER2 IHC cases scored by at least one pathologist for each subset of cases amongst 18 pathologists and 170 cases of breast cancer.**

| <b>HER2 IHC group</b> | <b>0 counts</b> | <b>1+ counts</b> | <b>2+ counts</b> | <b>3+ counts</b> | <b>Total Cases</b> |
|-----------------------|-----------------|------------------|------------------|------------------|--------------------|
| 0 only                | 92              | 69               | 29               | 0                | 92                 |
| 1+ only               | 69              | 102              | 61               | 2                | 102                |
| 2+ only               | 29              | 61               | 84               | 22               | 84                 |
| 3+ only               | 0               | 2                | 22               | 44               | 44                 |

*Each subset is defined by only including cases with the score from at least one pathologist*
